# Supplementary material for: Endothelial PKA activity regulates angiogenesis by limiting autophagy through phosphorylation of ATG16L1
Source: eLife. 2019 Oct 3;8:e46380. doi: 10.7554/eLife.46380 (PMC6797479; doi:10.7554/eLife.46380)
Supplement: Figure 3—source data 1. [file elife-46380-fig3-data1.xlsx]

## Sheet: Figure 3A
Figure 3A
	20180214_flag wt s268a sample 1
		flag ATG16L1a wt					flag ATG16L1a S268A
	CHX(h)	0	4	8	12		0	4	8	12
	flag	31.503	15.249	6.248	2.371		12.572	6.226	14.432	11.399
		1	0.484049	0.19833	0.0752627		1	0.495227	1.14795	0.906697
	GAPDH	33.268	24.763	22.627	19.342		22.106	23.388	21.903	32.603
		1	0.744349	0.680143	0.5814		1	1.05799	0.990817	1.47485
	flag/GAPDH	1	0.650299	0.291601	0.129451		1	0.468082	1.15859	0.614773
	20180214_flag wt s268a sample 2
		flag ATG16L1a wt					flag ATG16L1a S268A
	CHX(h)	0	4	8	12		0	4	8	12
	flag	39.075	40.78	14.373	5.772		29.594	22.925	19.222	28.258
		1	1.04363	0.367831	0.147716		1	0.77465	0.649524	0.954856
	GAPDH	33.644	20.75	22.613	22.993		25.882	24.217	19.847	30.055
		1	0.616752	0.672126	0.683421		1	0.93567	0.766826	1.16123
	flag/GAPDH	1	1.69215	0.547265	0.216142		1	0.82791	0.847028	0.822278
	20180215_flag wt s268a sample 3
		flag ATG16L1a wt					flag ATG16L1a S268A
	CHX(h)	0	4	8	12		0	4	8	12
	flag	15.711	7.434	5.573	2.396		20.578	12.498	18.854	16.956
		1	0.473172	0.35472	0.152505		1	0.607348	0.916221	0.823987
	GAPDH	13.178	11.459	10.483	11.163		13.292	12.399	13.72	14.306
		1	0.869555	0.795492	0.847094		1	0.932817	1.0322	1.07629
	flag/GAPDH	1	0.544154	0.445912	0.180033		1	0.65109	0.887639	0.765583
		flag ATG16L1a wt					flag ATG16L1a S268A
	flag/GAPDH	1	0.650299	0.291601	0.129451		1	0.468082	1.15859	0.614773
	flag/GAPDH	1	1.69215	0.547265	0.216142		1	0.82791	0.847028	0.822278
	flag/GAPDH	1	0.544154	0.445912	0.180033		1	0.65109	0.887639	0.765583

## Sheet: Figure 3B
Figure 3B
	20180228_flag wt s269a sample 1
		flag ATG16L1b wt					flag ATG16L1b S269A
	CHX(h)	0	4	8	12		0	4	8	12
	flag	35.851	23.541	23.25	17.359		26.471	24.556	23.929	25.044
		1	0.656634	0.648517	0.484198		1	0.927657	0.90397	0.946092
	GAPDH	26.953	24.9	24.343	23.803		26.141	23.998	25.312	24.549
		1	0.92383	0.903165	0.88313		1	0.918021	0.968287	0.939099
	flag/GAPDH	1	0.710774	0.71805	0.548276		1	1.0105	0.933577	1.00745
	20180301_flag wt s269a sample 2
		flag ATG16L1b wt					flag ATG16L1b S269A
	CHX(h)	0	4	8	12		0	4	8	12
	flag	38.056	23.556	20.72	17.668		23.977	19.277	27.604	29.143
		1	0.618983	0.544461	0.464263		1	0.803979	1.15127	1.21546
	GAPDH	30.094	21.892	21.961	26.052		22.809	25.066	25.691	26.433
		1	0.727454	0.729747	0.865688		1	1.09895	1.12635	1.15888
	flag/GAPDH	1	0.850889	0.746095	0.536294		1	0.731587	1.02212	1.04882
	20180301_flag wt s269a sample 3
		flag ATG16L1b wt					flag ATG16L1b S269A
	CHX(h)	0	4	8	12		0	4	8	12
	flag	46.082	26.823	16.584	10.511		30.299	18.966	23.185	27.55
		1	0.582071	0.35988	0.228093		1	0.625961	0.765207	0.909271
	GAPDH	30.54	25.462	22.918	21.081		23.159	25.263	22.786	28.792
		1	0.833726	0.750426	0.690275		1	1.09085	0.983894	1.24323
	flag/GAPDH	1	0.698156	0.479568	0.330438		1	0.573829	0.777733	0.731377
		flag ATG16L1b wt					flag ATG16L1b S269A
	flag/GAPDH	1	0.710774	0.71805	0.548276		1	1.0105	0.933577	1.00745
	flag/GAPDH	1	0.850889	0.746095	0.536294		1	0.731587	1.02212	1.04882
	flag/GAPDH	1	0.698156	0.479568	0.330438		1	0.573829	0.777733	0.731377

## Sheet: Figure 3C
20190419_GFP wt s268D sample 1 upper bands for GFP															GFP				GAPDH
	GFP ATG16L1a wt					GFP ATG16L1a S268D									Area	percent
CHX(h)	0	4	8	12		0	4	8	12					1	56153995	20.005		1	62181530	16.966
GFP	20.005	13.875	13.143	10.36		17.513	11.513	8.02	5.57					2	38945823	13.875		2	50436187	13.761
	1	0.693577	0.656986	0.517871		1	0.657397	0.457946	0.318049					3	36892116	13.143		3	37596066	10.258
														4	29079844	10.36		4	45463844	12.405
GAPDH	16.966	13.761	10.258	12.405		16.66	13.097	10.398	6.455					5	49158652	17.513		5	61060530	16.66
	1	0.811093	0.604621	0.731168		1	0.786134	0.62413	0.387455					6	32316359	11.513		6	47999894	13.097
														7	22512894	8.02		7	38110602	10.398
GFP/GAPDH	1	0.855114	1.08661	0.708278		1	0.83624	0.733735	0.820868					8	15633874	5.57		8	23657087	6.455
20190419_GFP wt s268D sample 2
	GFP ATG16L1a wt					GFP ATG16L1a S268D
CHX(h)	0	4	8	12		0	4	8	12						GFP				GAPDH
GFP	20.659	13.566	8.026	5.53		22.221	15.646	9.956	4.397					1	54838409	20.659		1	63145338	17.632
	1	0.656663	0.388499	0.26768		1	0.704109	0.448045	0.197876					2	36011187	13.566		2	56911217	15.892
														3	21303945	8.026		3	47494066	13.262
GAPDH	17.632	15.892	13.262	9.567		15.81	12.194	8.829	6.815					4	14678894	5.53		4	34260815	9.567
	1	0.901316	0.752155	0.542593		1	0.771284	0.558444	0.431056					5	58984258	22.221		5	56617894	15.81
														6	41532844	15.646		6	43668350	12.194
GFP/GAPDH	1	0.72856	0.516514	0.493335		1	0.912905	0.802309	0.459049					7	26427309	9.956		7	31618329	8.829
														8	11672409	4.397		8	24405238	6.815
20190424_GFP wt s268D sample 3
	GFP ATG16L1a wt					GFP ATG16L1a S268D
CHX(h)	0	4	8	12		0	4	8	12						GFP				GAPDH
GFP	16.229	15.733	10.399	6.479		22.041	14.053	9.685	5.381					1	45240016	16.229		1	56347995	19.266
	1	0.969437	0.640767	0.399224		1	0.637585	0.439408	0.244136					2	43856894	15.733		2	40343794	13.794
														3	28988158	10.399		3	20763258	7.099
GAPDH	19.266	13.794	7.099	4.955		20.555	15.444	11.52	7.366					4	18062238	6.479		4	14493480	4.955
	1	0.715976	0.368473	0.257189		1	0.75135	0.560448	0.358356					5	61443602	22.041		5	60119773	20.555
														6	39174016	14.053		6	45170581	15.444
GFP/GAPDH	1	1.35401	1.73898	1.55226		1	0.848585	0.784031	0.681267					7	26999723	9.685		7	33693702	11.52
														8	15000551	5.381		8	21542815	7.366
	GFP ATG16L1a wt					GFP ATG16L1a S268D
GFP/GAPDH	1	0.855114	1.08661	0.708278		1	0.83624	0.733735	0.820868
GFP/GAPDH	1	0.72856	0.516514	0.493335		1	0.912905	0.802309	0.459049
GFP/GAPDH	1	1.35401	1.73898	1.55226		1	0.848585	0.784031	0.681267

## Sheet: Figure 3D
20190419_GFP wt s269D sample 1 upper bands for GFP															GFP				GAPDH
	GFP ATG16L1b wt					GFP ATG16L1b S269D									Area	percent
CHX(h)	0	4	8	12		0	4	8	12					1	16789167	8.439		1	45153631	14.139
GFP	8.439	4.937	4.404	8.121		32.748	17.003	13.51	2.398					2	9822924	4.937		2	34556217	10.82
	1	0.585022	0.521863	0.962318		1	0.519207	0.412544	0.0732258					3	8762095	4.404		3	29038267	9.093
														4	16157167	8.121		4	27126066	8.494
GAPDH	14.139	10.82	9.093	8.494		19.378	18.362	11.919	7.796					5	65152551	32.748		5	61886359	19.378
	1	0.765259	0.643115	0.60075		1	0.947569	0.615079	0.402312					6	33826773	17.003		6	58641673	18.362
														7	26878388	13.51		7	38065480	11.919
GFP/GAPDH	1	0.764476	0.811461	1.60186		1	0.547936	0.670718	0.182013					8	4770731	2.398		8	24896258	7.796
20190419_GFP wt s269D sample 2
	GFP ATG16L1b wt					GFP ATG16L1b S269D
CHX(h)	0	4	8	12		0	4	8	12						GFP				GAPDH
GFP	15.175	6.403	5.841	3.13		25.502	19.298	7.903	1.572					1	33633924	15.175			1	53081823	18.684
	1	0.421944	0.384909	0.20626		1	0.756725	0.309897	0.0616422					2	14192409	6.403			2	40102409	14.115
														3	12946631	5.841			3	25200844	8.87
GAPDH	18.684	14.115	8.87	3.788		20.177	18.108	8.968	7.29					4	6937409	3.13			4	10761581	3.788
	1	0.755459	0.474738	0.20274		1	0.897458	0.444466	0.361302					5	56523886	25.502			5	57325572	20.177
														6	42773049	19.298			6	51445401	18.108
GFP/GAPDH	1	0.558526	0.810783	1.01736		1	0.843188	0.697234	0.170611					7	17515986	7.903			7	25479501	8.968
														8	3484217	1.572			8	20713016	7.29
20190424_GFP wt s269D sample 3
	GFP ATG16L1b wt					GFP ATG16L1b S269D
CHX(h)	0	4	8	12		0	4	8	12						GFP				GAPDH
GFP	16.22	8.889	11.167	5.849		25.843	17.408	12.728	1.896					1	30018652	16.22			1	33167309	13.794
	1	0.548027	0.688471	0.360604		1	0.673606	0.492512	0.0733661					2	16450167	8.889			2	31997388	13.307
														3	20666459	11.167			3	24294894	10.104
GAPDH	13.794	13.307	10.104	8.831		12.872	18.926	12.407	9.76					4	10824409	5.849			4	21234359	8.831
	1	0.964695	0.732492	0.640206		1	1.47032	0.963875	0.758235					5	47827744	25.843			5	30951279	12.872
														6	32217066	17.408			6	45508309	18.926
GFP/GAPDH	1	0.568083	0.939902	0.563263		1	0.458135	0.510971	0.0967591					7	23555673	12.728			7	29833158	12.407
														8	3509045	1.896			8	23468827	9.76
	GFP ATG16L1b wt					GFP ATG16L1b S269D
GFP/GAPDH	1	0.764476	0.811461	1.60186		1	0.547936	0.670718	0.182013
GFP/GAPDH	1	0.558526	0.810783	1.01736		1	0.843188	0.697234	0.170611
GFP/GAPDH	1	0.568083	0.939902	0.563263		1	0.458135	0.510971	0.0967591

## Sheet: Figure 3E
	20170915								20170808								20180329
	shRNA		shPKA						shRNA		shPKA						shRNA		shPKA
		scramble	#1	#2		Area	Percent			scramble	#1	#2		Area	Percent			scramble	#1	#2		Area	Percent
	ATG16L1	24.364	34.542	41.094	1	18624744	24.364		ATG16L1	20.696	38.835	40.469	1	15579430	20.696		ATG16L1	19.688	45.87	34.442	1	12466472	19.688
		1	1.41775	1.68667	2	26405208	34.542			1	1.87645	1.9554	2	29234380	38.835			1	2.32985	1.74939	2	29044948	45.87
	ATG16L1/GAPDH	1	1.27	1.45202	3	31414028	41.094		ATG16L1/GAPDH	1	2.36631	3.91871	3	30464593	40.469		ATG16L1/GAPDH	1	3.3469	1.85037	3	21808777	34.442
	LC3II	27.626	28.05	44.324	1	21095551	27.626		LC3II				1				LC3II	24.744	27.153	48.103	1	10798673	24.744
		1	1.01535	1.60443	2	21419229	28.05						2					1	1.09736	1.94403	2	11850007	27.153
	LC3II/GAPDH	1	0.909538	1.38122	3	33845856	44.324		LC3II/GAPDH				3				LC3II/GAPDH	1	1.57639	2.05624	3	20993312	48.103
	P62	47.626	29.897	22.477	1	37299007	47.626		P62	43.694	29.189	27.117	1	33637827	43.694		P62	46.218	24.916	28.866	1	33799806	46.218
		1	0.627745	0.471948	2	23413966	29.897			1	0.668032	0.620612	2	22470693	29.189			1	0.539097	0.624562	2	18220886	24.916
	P62/GAPDH	1	0.562328	0.406291	3	17603187	22.477		P62/GAPDH	1	0.842426	1.24373	3	20876179	27.117		P62/GAPDH	1	0.774432	0.660614	3	21109806	28.866
	PKACa	87.614	3.138	9.249	1	46426421	87.614		PKACa	95.977	0.928	3.095	1	44135321	95.977		PKACa	91.932	1.981	6.087	1	42254563	91.932
		1	0.0358162	0.105565	2	1662723	3.138			1	0.00966898	0.0322473	2	426548	0.928			1	0.0215485	0.066212	2	910660	1.981
	PKACa/GAPDH	1	0.0320838	0.0908791	3	4900773	9.249		PKACa/GAPDH	1	0.0121931	0.064625	3	1423288	3.095		PKACa/GAPDH	1	0.0309552	0.070034	3	2797815	6.087
	GAPDH	30.507	34.056	35.437	1	11270894	30.507		GAPDH	43.63	34.598	21.771	1	14260915	43.63		GAPDH	37.857	26.353	35.791	1	14076167	37.857
		1	1.11633	1.1616	2	12582217	34.056			1	0.792986	0.498992	2	11308827	34.598			1	0.69612	0.945426	2	9798551	26.353
					3	13092530	35.437						3	7116208	21.771						3	13307865	35.791
	shRNA		shPKA
		scramble	#1	#2
	ATG16L1/GAPDH	1	1.27	1.45202
	ATG16L1/GAPDH	1	2.36631	3.91871
	ATG16L1/GAPDH	1	3.3469	1.85037
	LC3II/GAPDH	1	0.909538	1.38122
	LC3II/GAPDH
	LC3II/GAPDH	1	1.57639	2.05624
	P62/GAPDH	1	0.562328	0.406291
	P62/GAPDH	1	0.842426	1.24373
	P62/GAPDH	1	0.774432	0.660614
	PKACa/GAPDH	1	0.0320838	0.0908791
	PKACa/GAPDH	1	0.0121931	0.064625
	PKACa/GAPDH	1	0.0309552	0.070034

## Sheet: Figure 3F
			500uM
		DMSO	6-bnz-cAMP	DMSO	6-bnz-cAMP	DMSO	6-bnz-cAMP
	P62	10.311	18.551	7.27	22.581	8.825	32.463				Area	Percent
		1	1.79915	1	3.10605	1	3.67853			1	13411480	10.311
	P62/GAPDH	1	2.81315	1	2.968	1	3.44416			2	24129049	18.551
										3	9455832	7.27
	P62/GAPDH	1	2.81315							4	29370995	22.581
		1	2.968							5	11478581	8.825
		1	3.44416							6	42224451	32.463
	LC3II	19.141	15.456	17.309	11.737	19.863	16.494			1	42564907	19.141
		1	0.807481	1	0.678087	1	0.830388			2	34371815	15.456
	LC3II/GAPDH	1	1.26258	1	0.647948	1	0.777482			3	38491652	17.309
										4	26101229	11.737
	LC3II/GAPDH	1	1.26258							5	44170401	19.863
		1	0.647948							6	36678220	16.494
		1	0.777482
	GAPDH	24.486	15.66	9.051	9.472	19.986	21.346			1	20726673	24.486
		1	0.639549	1	1.04651	1	1.06805			2	13255685	15.66
										3	7661844	9.051
										4	8017510	9.472
										5	16917652	19.986
										6	18069037	21.346
	ATG6L1	23.91	13.165	18.485	10.689	17.239	16.512			1	44575915	23.91
		1	0.550606	1	0.578253	1	0.957828			2	24543602	13.165
	ATG6L1/GAPDH	1	0.662828	1	0.534959	1	0.802331			3	34462187	18.485
										4	19927744	10.689
	ATG6L1/GAPDH	1	0.662828							5	32139409	17.239
		1	0.534959							6	30783602	16.512
		1	0.802331
	GAPDH	19.757	16.412	13.518	14.612	16.274	19.428			1	40234652	19.757
		1	0.830693	1	1.08093	1	1.19381			2	33422238	16.412
										3	27529581	13.518
										4	29756631	14.612
										5	33141602	16.274
										6	39565865	19.428
			500uM
		DMSO	6-bnz-cAMP
	P62/GAPDH	1	2.81315
		1	2.968
		1	3.44416
	LC3II/GAPDH	1	1.26258
		1	0.647948
		1	0.777482
	ATG6L1/GAPDH	1	0.662828
		1	0.534959
		1	0.802331

## Sheet: Figure 3G
			wt	dnPKA iEC			area	Percent
	Sample1	ATG16L1	40.247	59.753		1	39563513	40.247
			1	1.48466		2	58737442	59.753
		ATG16L1/Actin	1	1.29482
		actin	46.585	53.415		1	34802449	46.585
			1	1.14661		2	39904467	53.415
	Sample2	ATG16L1	42.362	57.638		1	37509957	42.362
			1	1.36061		2	51037271	57.638
		ATG16L1/Actin	1	1.76543
		actin	56.475	43.525		1	25891333	56.475
			1	0.770695		2	19954718	43.525
	Sample3	ATG16L1	44.943	55.057		1	52411655	44.943
			1	1.22504		2	64205848	55.057
		ATG16L1/Actin	1	1.31338
		actin	51.74	48.26		1	45416969	51.74
			1	0.932741		2	42362798	48.26
			wt	dnPKA iEC
		ATG16L1/Actin	1	1.29482
			1	1.76543
			1	1.31338
