# Supplementary material for: Endothelial PKA activity regulates angiogenesis by limiting autophagy through phosphorylation of ATG16L1
Source: eLife. 2019 Oct 3;8:e46380. doi: 10.7554/eLife.46380 (PMC6797479; doi:10.7554/eLife.46380)
Supplement: Figure 4—figure supplement 1—source data 1. [file elife-46380-fig4-figsupp1-data1.xlsx]

## Sheet: figure 4 supplement 1(C-D)
figure 4 supplement 1 C
			Green vessles IB4-488
	WT PBS retinas(n=6)	WT PBS images (n=30)	WT CQ retinas(n=6)	WT CQ images (n=34)	dnPKA PBS retinas(n=7)	dnPKA PBS images (n=35)	dnPKA CQ retinas(n=7)	dnPKA CQ images (n=34)
	20170601 retina 06-1	69057	20170601 retina 05-1	75901	20170611 retina 05-1	159306	20170611 retina 03-1	121822
		51903		65479		145994		107508
		69874		56240		163058		145553
		64457		72753		89143		128628
		53338		74560		150751	20170611 retina 03-2	111817
		69793		55731	20170611 retina 05-2	105189		127686
	20170601 retina 06-2	62582	20170601 retina 05-2	49429		164756		118249
		46581		65142		140759		88645
		76833		67232		162998		104580
		73133		84778		100772	20170613 retina 1.3-1	112464
	20170613 retina 2-2-1	77658		74356	20170613 retina 1.5-1	165835		134845
		78365		75813		151318		126378						(9
		68443	20170613 retina 2-4-1	72517		155786		102513
		73182		63716		158325		155184
		60293		61499		137757	20170613 retina 1.3-2	138265
		80020	20170613 retina 2-4-2	60192	20170613 retina 1.5-2	137136		127654
	20170613 retina 2-2-2	73505		57777		123031		98750
		102080		58548		184965		126226
		71847		63927		183415		119176
		69158		72183		135323	20170607 retina 03-1	109185
		69895		80882	20170607 retina 01-1	126853		143528
		99857		64265		145082		96715
	20170613 retina 2-1-1	45398		75061		160949		125884
		62051	20170613 retina 2-6-1	57614		170774		95684
		62436		52604		83032	20170607 retina 03-2	116165
		73776		80707	20170607 retina 01-2	165091		141631
	20170613 retina 2-1-2	63796		55192		165440		113664
		87464		45204		117135		158939
		77633		86304		139689		122881
		46038	20170613 retina 2-6-2	63460		103961	20170607 retina 04-1	125013
				77351	20170607 retina 02-1	132392		112411
				63207		168912		100034
				49151		164263		145079
				41416		146073		92326
						93465
figure 4 supplement 1 D
			ESM-1 Red 555
	WT PBS retinas(n=6)	WT PBS images (n=30)	WT CQ retinas(n=6)	WT CQ images (n=34)	dnPKA PBS retinas(n=7)	dnPKA PBS images (n=35)	dnPKA CQ retinas(n=7)	dnPKA CQ images (n=34)
	20170601 retina 06-1	1369	20170601 retina 05-1	395	20170611 retina 05-1	17596	20170611 retina 03-1	18570
		456		1162		11454		4751
		689		1482		13202		3331
		946		1607		5641		7415
		569		2792		10443	20170611 retina 03-2	3227
		958		498	20170611 retina 05-2	4922		6349
	20170601 retina 06-2	1659	20170601 retina 05-2	1251		29075		2823
		308		1523		22600		2165
		879		812		32120		2920
		1133		1307		4537	20170613 retina 1.3-1	2493
	20170613 retina 2-2-1	2367		1112	20170613 retina 1.5-1	12565		5903
		1166		1467		5427		7144
		2167	20170613 retina 2-4-1	1958		17220		2491
		1370		684		9069		8543
		631		799		7240	20170613 retina 1.3-2	10462
		999	20170613 retina 2-4-2	748	20170613 retina 1.5-2	8723		4623
	20170613 retina 2-2-2	2681		387		5764		1808
		1161		613		21121		7817
		627		1153		19240		8191
		1243		1213		8971	20170607 retina 03-1	7098
		1904		973	20170607 retina 01-1	6051		21803
		1454		1026		6010		7628
	20170613 retina 2-1-1	584		1687		17301		17460
		1991	20170613 retina 2-6-1	463		20213		5112
		579		1149		2411	20170607 retina 03-2	4460
		334		1529	20170607 retina 01-2	32384		11262
	20170613 retina 2-1-2	851		506		22683		7234
		1358		1205		8852		20135
		1186		1075		37105		9164
		799	20170613 retina 2-6-2	1327		6822	20170607 retina 04-1	8815
				1429	20170607 retina 02-1	26291		6629
				1209		58415		3512
				1454		41305		14190
				546		28588		2182
						6110
