# Supplementary material for: Endothelial PKA activity regulates angiogenesis by limiting autophagy through phosphorylation of ATG16L1
Source: eLife. 2019 Oct 3;8:e46380. doi: 10.7554/eLife.46380 (PMC6797479; doi:10.7554/eLife.46380)
Supplement: Figure 4—source data 1. [file elife-46380-fig4-data1.xlsx]

## Sheet: Figure 4B
	Radial expansion
	wtPKA wtATG5										wtPKA ATG5ECKO										dnPKAiEC wtATG5										dnPKAiEC ATG5ECKO
Retina		mean	StdDev	Min	Max	Angle	Length(um)	AVERAGE		Retina		mean	StdDev	Min	Max	Angle	Length(um)			Retina		mean	StdDev	Min	Max	Angle	Length(um)			Retina		mean	StdDev	Min	Max	Angle	Length(um)
1.11-1	1	73638	23700	40	148130	72697	1403.12	1417.85		3.1-1	1	108900	35954	50	249641	143653	1372.07	1252.42		1.3-1	1	55201	28061	17297	138784	-10856	622.547	652.582		1.10-1	1	104154	37409	61613	213556	-166422	1012.59	1034.46
	2	76946	28371	36850	168480	1616	1329.2				2	91788	45888	46683	231365	76329	1270.11				2	61784	23108	25529	109866	97177	566.103				2	107580	35314	50433	222333	3409	980.315
	3	79158	27953	44467	165338	176857	1447.47				3	93695	38178	50160	209836	-47171	1243.06				3	59975	24588	27667	150856	-178325	711.915				3	100867	36565	58547	197448	97125	1041.87
	4	87615	25692	54055	186383	-107067	1491.61				4	103409	37196	52852	224300	-114479	1124.43				4	57700	28322	24083	134224	-101837	709.763				4	103777	29087	63546	180419	-86100	1103.08
1.11-2	1	59669	22623	31	156564	90	1323.07	1414.19		3.2-2	1	107930	28946	59399	174667	96154	1554.41	1475.01		1.3-2	1	39238	20360	21308	172093	60493	868.807	965.745		1.10-2	1	69693	30815	0	167202	98160	1145.46	1043.11
	2	73143	35064	39747	253000	1975	1451.79				2	103297	34868	55487	221553	30483	1360.53				2	78726	29572	35258	199247	-92770	1035.21				2	92761	42730	0	194764	3122	918.619
	3	82417	36682	31629	237000	-75725	1450.76				3	121738	37962	71070	213697	-9032	1463.23				3	56287	19071	29541	116611	-10773	961.648				3	82554	32008	4	180385	-87357	1085.18
	4	48439	15286	26000	105314	-176653	1431.13				4	116795	41999	60000	247714	-43332	1521.87				4	37224	16396	13095	105492	-176170	997.317				4	80530	31681	42069	163273	-160974	1023.18
4.6-1	1	58554	20414	8424	119892	82995	1232.18	1220.62		3.6-1	1	88168	32674	36128	241430	92079	1262.7	1378.38		4.5-1	1	70727	27948	23	138021	85329	1076.59	1087.1		1.12-1	1	62752	26504	23	119266	77631	973.799	945.708
	2	58921	21440	24360	124694	-2322	1235.14				2	67434	25194	29129	144141	-3125	1453.02				2	73600	31572	31071	235000	17155	1005.85				2	71435	27372	20	135999	-177161	1007.44
	3	49421	16056	6333	119163	-93426	1186.3				3	59341	24215	36808	165894	-90988	1451.1				3	73800	27592	22072	145453	-72442	1119.92				3	62683	28647	27	147287	-91798	928.789
	4	42942	14618	22833	106376	178831	1228.88				4	87125	40265	34127	231250	-177510	1346.7				4	75276	28259	25000	170802	-166115	1146.04				4	57749	23549	19	114370	-0.273	872.8
4.6-2	1	86670	27590	36051	157739	84952	1183.26	1259.32		3.6-2	1	90156	33588	28	214625	87563	1179.6	1225.52		4.5-2	1	90811	31592	37320	193046	78445	959.428	931.219		1.12-2	1	80681	23491	35154	150074	99028	901.127	991.314
	2	77036	23903	33000	159771	2545	1310.47				2	113636	44791	56682	211252	0.571	1256.41				2	86989	35976	41704	172772	5332	943.693				2	77492	25623	45124	140889	177643	1012.51
	3	78554	27178	44419	163192	-90388	1228.58				3	128680	43475	72957	253000	-92523	1229.82				3	83233	31558	36000	165880	-77652	859.24				3	76106	22744	39000	145388	-106675	946.195
	4	79872	30882	39003	194686	176186	1314.96				4	94689	34111	57394	214675	-3480	1236.24				4	115039	29021	60193	186648	177759	962.515				4	88968	32251	39672	166600	-47291	1105.43
5.1-1	1	39371	15101	0	82863	1961	1218.07	1229.49		4.3-1	1	88402	30768	23	175699	-0.688	1045.17	1022.32		4.12-1	1	98534	44368	39906	246150	82683	1081.87	970.439		4.9-1	1	70484	21081	40	132591	-7214	997.053	978.055
	2	29404	11848	16613	82544	103589	1293.03				2	69500	26188	42939	164726	-89750	956.185				2	95407	34705	47068	182000	6941	968.788				2	77416	35142	37741	188101	174357	1061.5
	3	28467	10714	15953	69385	-93442	1113.82				3	77954	24684	40667	142799	-179275	989.586				3	84721	37176	39905	253000	-85934	880.467				3	64490	23566	29333	182828	94946	870.708
	4	14618	8667	0.144	44737	166368	1293.03				4	80360	26801	4000	159722	85651	1098.32				4	72078	27010	37181	185000	-179749	950.626				4	76627	29116	18000	172809	-95614	982.959
5.1-2	1	52088	19150	30314	121321	87832	1324.02	1303.7		4.3-2	1	65814	33010	27	233265	148965	1146.92	1094.27		4.12-2	1	68185	28794	18383	140444	9411	765.869	865.885		4.9-2	1	66157	21452	13667	141586	14756	965.433	1039.93
	2	58445	29252	21000	149960	-0.191	1250.82				2	88911	25213	57586	174784	-42891	1042.29				2	68792	32797	0.000	173663	94764	803.288				2	75442	23631	5000	129273	-92104	1023.62
	3	49081	19095	24042	123758	-95576	1413.31				3	78936	25590	51973	164777	29628	1010.84				3	63110	22442	30651	106878	-162897	907.347				3	62562	27495	0.000	130911	92592	1012.74
	4	48172	20923	21000	120191	175527	1226.65				4	83013	28548	57182	218184	-97326	1177.03				4	68918	27830	27000	154869	-85638	987.038				4	94260	34290	51798	251270	-176900	1157.91
7.4-1	1	78464	28848	39099	151139	85179	1389.14	1320.38		6.6-1	1	80562	26870	0	158730	87418	1574.89	1595.44		6.8-1	1	73518	30386	37062	231368	77816	1126.36	1108.66		7.3-1	1	72980	26172	20304	122348	-2282	1151.6	1038.22
	2	76027	33900	30554	181924	0.863	1384.4				2	73143	28013	0	216917	5126	1585.39				2	83992	31053	26667	187943	-13241	1165.03				2	61541	25982	20000	139339	-85417	1098.75
	3	75857	41251	39000	253000	-93004	1352.8				3	69726	28479	38565	178951	-93020	1664.56				3	73898	24317	37883	153773	-105092	1151.64				3	65337	22064	30390	128754	82940	912.933
	4	67839	40100	34718	253000	170640	1155.19				4	81310	33051	41102	253000	-178775	1556.91				4	67788	25664	33008	199718	-170815	991.599				4	55751	25787	25173	133532	179275	989.586
7.4-2	1	57565	30830	22657	231118	83180	1265.3	1269.78		6.6-2	1	88076	42626	54891	253	5602	1536.11	1543.73		6.8-2	1	71743	28448	27	151177	69605	1037.79	1070.95		7.3-2	1	81821	29100	38353	159569	-1053	1134.28	1158.12
	2	60834	26881	29444	153951	0.707	1350.97				2	81807	35173	39225	252819	108193	1562.83				2	77622	30998	23312	211764	-7667	1093.62				2	64583	28772	35667	253000	97431	1160.49
	3	51658	25949	24827	137000	-90382	1250.85				3	68560	21772	16120	142560	-86766	1475.53				3	91643	39930	42272	245014	-76185	1047.62				3	59149	31141	30468	253000	179574	1122.96
	4	44799	29446	22219	244008	-179212	1212				4	56191	23055	20899	124598	-173412	1600.46				4	60863	23607	35551	136000	175021	1104.76				4	79850	22665	43876	160472	-86068	1214.75
9.8-1	1	57226	17191	29560	123128	82519	1250.12	1279.77		7.2-1	1	43498	14997	6	81023	77341	1595.47	1558.86		7.7-1	1	60577	25783	3	129521	88608	1028.81	1012.07		9.9-1	1	55962	12938	28911	86518	83524	777.82	884.886
	2	46240	12006	29657	94034	-3250	1325.36				2	30322	14943	0	138828	-10969	1512.17				2	82769	37350	8	182504	1664	1006.59				2	53901	10714	27000	101964	-5001	1004.59
	3	54198	14043	34495	96298	-101274	1320.28				3	35522	16019	17821	85388	-96459	1555.64				3	55859	24591	26996	147097	-94116	1103.45				3	57359	12236	35315	91484	-90000	906.137
	4	54900	17240	22622	98898	-178636	1223.32				4	40005	14158	17243	84536	-166516	1572.17				4	63128	31629	19333	194782	169719	909.422				4	45614	15577	0.000	70865	178315	851
9.8-2	1	56675	20823	25368	140667	-93814	1504.3	1416.2		7.2-2	1	50747	23368	0	135229	82191	1470.17	1487.58		7.7-2	1	57237	20547	29925	121303	87650	1118.27	1080.51		9.9-2	1	94725	36643	45048	203891	97312	947.419	954.881
	2	64187	24471	30356	151026	-2291	1357.57				2	61644	33630	10235	144828	-6559	1572.21				2	71867	25561	31602	150496	-2851	1091.01				2	88307	31445	45724	192433	8477	876.598
	3	66936	20552	23000	160000	-89494	1417.62				3	53164	20196	32206	112932	-101684	1379.17				3	69653	34260	22149	155825	-95711	1044.91				3	90483	35079	49953	245343	-85397	987.038
	4	58781	28094	20349	189715	177585	1385.34				4	54522	21670	27000	131975	180000	1528.76				4	49687	17880	25875	124646	178210	1067.87				4	106136	39192	51724	250661	-168783	1008.47
		wtPKA wtATG5			wtPKA ATG5ECKO			dnPKAiEC wtATG5			dnPKAiEC ATG5ECKO
		Retina	Length(um)		Retina	Length(um)		Retina	Length(um)		Retina	Length(um)
		1.11-1	1417.85	1.07975	3.1-1	1252.42	0.953837	1.3-1	652.582	0.496967	1.10-1	1034.46	0.787783
		1.11-2	1414.19	1.07696	3.2-2	1475.01	1.12336	1.3-2	965.745	0.735452	1.10-2	1043.11	0.79437
		4.6-1	1220.62	0.929553	3.6-1	1378.38	1.04977	4.5-1	1087.1	0.82787	1.12-1	945.708	0.720194
		4.6-2	1259.32	0.959021	3.6-2	1225.52	0.933351	4.5-2	931.219	0.70916	1.12-2	991.314	0.754925
		5.1-1	1229.49	0.936304	4.3-1	1022.32	0.778593	4.12-1	970.439	0.739027	4.9-1	978.055	0.744827
		5.1-2	1303.7	0.992817	4.3-2	1094.27	0.833392	4.12-2	865.885	0.659406	4.9-2	1039.93	0.791944
		7.4-1	1320.38	1.00552	6.6-1	1595.44	1.21508	6.8-1	1108.66	0.844286	7.3-1	1038.22	0.790643
		7.4-2	1269.78	0.966987	6.6-2	1543.73	1.1757	6.8-2	1070.95	0.815568	7.3-2	1158.12	0.881953
		9.8-1	1279.77	0.974595	7.2-1	1558.86	1.18723	7.7-1	1012.07	0.77073	9.9-1	884.886	0.673875
		9.8-2	1416.2	1.07849	7.2-2	1487.58	1.13294	7.7-2	1080.51	0.822853	9.9-2	954.881	0.72718
			1313.13	107.975			95.3837			49.6967			78.7783
				107.696			112.336			73.5452			79.437
				92.9553			104.977			82.787			72.0194
				95.9021			93.3351			70.916			75.4925
				93.6304			77.8593			73.9027			74.4827
				99.2817			83.3392			65.9406			79.1944
				100.552			121.508			84.4286			79.0643
				96.6987			117.57			81.5568			88.1953
				97.4595			118.723			77.073			67.3875
				107.849			113.294			82.2853			72.718

## Sheet: Figure 4C
60X
	retina (image code)	counting length(um)	sprouts	sprouts/100um	average sprouts/100um
1.10-1	1.10-1.1	1465	26	1.77474	1.60946		wtPKA wtATG5			wtPKA ATG5ECKO			dnPKAiEC wtATG5			dnPKAiEC ATG5ECKO
	1.10-1.2	1389	23	1.65587			Retina	average sprouts/100um		Retina	average sprouts/100um		Retina	average sprouts/100um		Retina	average sprouts/100um
	1.10-1.3	1551	24	1.54739			1.11-1	1.05404		3.1-1	1.19202		1.3-1	2.12682		1.10-1	1.60946
	1.10-1.4	959	14	1.45985			1.11-2	0.996731		3.2-2	1.03817		1.3-2			1.10-2	1.79647
							4.6-1	1.14351		3.6-1	1.0966		4.5-1	1.91547		1.12-1	1.81919
1.10-2	1.10-2.1	1760	36	2.04545	1.79647		4.6-2	1.01132		3.6-2	0.922605		4.5-2	1.98875		1.12-2	1.68364
	1.10-2.2	1297	23	1.77332			5.1-1	1.0257		4.3-1	0.868876		4.12-1	1.94809		4.9-1	1.8816
	1.10-2.3	1152	18	1.5625			5.1-2	1.15647		4.3-2	0.817563		4.12-2	2.05873		4.9-2	1.83788
	1.10-2.4	1607	29	1.8046			7.4-1	0.765783		6.6-1	0.963064		6.8-1	1.43421		7.3-1	1.48979
							7.4-2	0.809117		6.6-2	1.04281		6.8-2	1.44709		7.3-2	1.40433
1.12-1	1.12-1.1	1197	24	2.00501	1.81919		9.8-1	0.974884		7.2-1	0.890579		7.7-1	1.59415		9.9-1
	1.12-1.2	1571	30	1.90961			9.8-2	1.19543		7.2-2	0.890775		7.7-2	1.85066		9.9-2	1.53384
	1.12-1.3	1382	25	1.80897
	1.12-1.4	837	13	1.55317
							1.11-1	1.05793		3.1-1	1.15702		4.5-1	2.02206		1.10-1	1.77474
1.12-2	1.12-2.1	1079	20	1.85357	1.68364			0.866218			1.22699			1.96937			1.65587
		989	14	1.41557				1.10917			1.16822			1.77743			1.54739
	1.12-2.2	1033	20	1.93611				1.18285			0.907188			1.893			1.45985
	1.12-2.3	1177	18	1.52931			1.11-2	0.75979			1.50068		4.5-2	2.03443		1.10-2	2.04545
								0.983796		3.1-2	0.996441			1.95531			1.77332
4.5-1	4.5-1.1	1632	33	2.02206	1.91547			1.23882			1.05485			1.9833			1.5625
	4.5-1.2	1371	27	1.96937				1.00452			1.0632			1.98198			1.8046
	4.5-1.3	1294	23	1.77743			4.6-1	1.26374		3.6-1	1.22154		4.12-1	1.60467		1.12-1	2.00501
	4.5-1.4	1215	23	1.893				1.04244			1.1925			2.1796			1.90961
								1.19386			0.945307			2.23881			1.80897
4.5-2	4.5-2.1	1278	26	2.03443	1.98875			1.07399			1.02703			1.76929			1.55317
		1074	21	1.95531			4.6-2	0.97629		3.6-2	0.849377		4.12-2	2.0219		1.12-2	1.85357
	4.5-2.2	958	19	1.9833				0.998668			1.06762			2			1.41557
	4.5-2.3	1110	22	1.98198				0.946746			0.941828			1.84615			1.93611
								1.1236			0.831601			2.36686			1.52931
4.9-1	4.9-1.1	1751	35	1.99886	1.8816		5.1-1	1.09204		4.3-1	0.903226		6.8-1	1.43266		4.9-1	1.99886
	4.9-1.2	1370	25	1.82482				1.22117			0.835655			1.34933			1.82482
		1228	20	1.62866				0.820283			0.819193			1.3587			1.62866
	4.9-1.3	1350	28	2.07407				0.969305			0.917431			1.59617			2.07407
							5.1-2	0.944767		4.3-2	0.77101		6.8-2	1.25554		4.9-2	2.10787
4.9-2	4.9-2.1	1613	34	2.10787	1.83788			1.37836			0.749376			1.74419			1.73787
	4.9-2.2	1381	24	1.73787				1.15681			0.782123			1.6129			1.6812
	4.9-2.3	1606	27	1.6812				1.14596			0.967742			1.17574			1.82456
	4.9-2.4	1425	26	1.82456			7.4-1	0.830816		6.6-1	0.93985		7.7-1	1.50215		7.3-1	1.33001
								0.703235			0.894855			1.59944			1.52249
4.12-1	4.12-1.1	1371	22	1.60467	1.94809			0.811808			0.881834			1.44435			1.38408
	4.12-1.2	1147	25	2.1796				0.717274			1.13572			1.83066			1.72257
		1340	30	2.23881			7.4-2	0.858086		6.6-2 o	1.2404		7.7-2	1.65826		7.3-2	1.23816
	4.12-1.3	1413	25	1.76929				0.843486			1.01553			1.86335			1.7101
								0.632911			0.956284			2.04856			1.23167
4.12-2	4.12-2.1	1187	24	2.0219	2.05873			0.901984			0.959024			1.83246			1.43737
	4.12-2.2	850	17	2			9.8-1	0.853728		7.2-1	0.797057		1.3-2	2.24057		9.9-2	1.71844
	4.12-2.3	1300	24	1.84615				0.932401			0.960922			2.14286			1.63462
	4.12-2.4	1014	24	2.36686				1.05422			0.921332			1.99704			1.41661
								1.05919			0.883002						1.36571
6.8-1	6.8-1.1	1745	25	1.43266	1.43421		9.8-2	1.11576		7.2-2	0.941029
	6.8-1.2	1334	18	1.34933				1.1465			0.790798
	6.8-1.3	1472	20	1.3587				1.25786			0.893997
	6.8-1.4	1253	20	1.59617				1.26162			0.937275
6.8-2	6.8-2.1	1354	17	1.25554	1.44709
	6.8-2.2	1376	24	1.74419
	6.8-2.3	1302	21	1.6129
	6.8-2.4	1616	19	1.17574
7.3-1	7.3-1.1	1203	16	1.33001	1.48979
	7.3-1.2	1445	22	1.52249
	7.3-1.3	1734	24	1.38408
	7.3-1.4	1103	19	1.72257
7.3-2	7.3-2.1	1373	17	1.23816	1.40433
	7.3-2.2	1228	21	1.7101
	7.3-2.3	1705	21	1.23167
	7.3-2.4	1461	21	1.43737
7.7-1	7.7-1.1	1398	21	1.50215	1.59415
	7.7-1.2	1438	23	1.59944
	7.7-1.3	1177	17	1.44435
	7.7-1.4	1748	32	1.83066
7.7-2	7.7-2.1	1387	23	1.65826	1.85066
	7.7-2.2	1449	27	1.86335
	7.7-2.3	1318	27	2.04856
	7.7-2.4	1528	28	1.83246
9.9-2	9.9-2.1	1513	26	1.71844	1.53384
	9.9-2.2	1040	17	1.63462
	9.9-2.3	1553	22	1.41661
	9.9-2.4	1318	18	1.36571
1.3-2	1.3-2.1	848	19	2.24057	2.12682
		1400	30	2.14286
	1.3-2.2	1352	27	1.99704
	1.11-1	1985	21	1.05793	1.05404
		1039	9	0.866218
		1713	19	1.10917
		2029	24	1.18285
	1.11-2	1711	13	0.75979	0.996731
		1728	17	0.983796
		1453	18	1.23882
		1991	20	1.00452
	3.1-1	1210	14	1.15702	1.19202
		978	12	1.22699
		1284	15	1.16822
		1433	13	0.907188
		1466	22	1.50068
	3.1-2	1405	14	0.996441	1.03817
		1422	15	1.05485
		1693	18	1.0632
	3.6-1	1801	22	1.22154	1.0966
		1761	21	1.1925
		1481	14	0.945307
		1850	19	1.02703
	3.6-2	1766	15	0.849377	0.922605
		1405	15	1.06762
		1805	17	0.941828
		1443	12	0.831601
	4.3-1	1550	14	0.903226	0.868876
		1077	9	0.835655
		1709	14	0.819193
		1417	13	0.917431
	4.3-2	1297	10	0.77101	0.817563
		1201	9	0.749376
		895	7	0.782123
		1550	15	0.967742
	4.6-1	1820	23	1.26374	1.14351
		1343	14	1.04244
		1759	21	1.19386
		1676	18	1.07399
	4.6-2	1434	14	0.97629	1.01132
		1502	15	0.998668
		1690	16	0.946746
		1780	20	1.1236
	5.1-1	1282	14	1.09204	1.0257
		2211	27	1.22117
		1341	11	0.820283
		1238	12	0.969305
	5.1-2	1376	13	0.944767	1.15647
		1451	20	1.37836
		1556	18	1.15681
		1658	19	1.14596
	6.6-1	1596	15	0.93985	0.963064
		1788	16	0.894855
		1701	15	0.881834
		1761	20	1.13572
	6.6-2 o	1693	21	1.2404	1.04281
		1674	17	1.01553
		2196	21	0.956284
		1147	11	0.959024
	7.2-1	1631	13	0.797057	0.890579
		1561	15	0.960922
		1411	13	0.921332
		1359	12	0.883002
	7.2-2	1594	15	0.941029	0.890775
		1391	11	0.790798
		1566	14	0.893997
		1387	13	0.937275
	7.4-1	1324	11	0.830816	0.765783
		1422	10	0.703235
		1355	11	0.811808
		1673	12	0.717274
	7.4-2	1515	13	0.858086	0.809117
		1067	9	0.843486
		1422	9	0.632911
		1663	15	0.901984
	9.8-1	1757	15	0.853728	0.974884
		1287	12	0.932401
		1328	14	1.05422
		1605	17	1.05919
	9.8-2	1434	16	1.11576	1.19543
		1570	18	1.1465
		1590	20	1.25786
		1506	19	1.26162

## Sheet: Figure 4E-4F
Figure 4E
			Green vessels IB4-488
	PKA WT /ATG5 WT/ CRE		PKA WT/ ATG5ECKO/ CRE		dnPKAiEC/ATG5 WT/CRE		dnPKAiEC/ATG5ECKO/ CRE
	Retinas(n=10)	images(n=79)	Retinas(n=10)	images(n=75)	Retinas(n=7)	images(n=50)	Retinas(n=8)	images(n=64)
	201804 retina 4.6-1	35428	201804 retina 4.3-1	41687	201804 retina 1.3-2	73887	201804 retina 4.9-1	35428
		43077		47628		76730		52179
		35167		51103		40433		67039
		37764		45136		84351		52508
		39718		43336		79784		46954
		30953		42169	201804 retina 4.5-1	86407		53385
		32534		38814		58376		45094
		37427		45497		79409		53567
	201804 retina 4.6-2	32044		46533		80409	201804 retina 4.9-2	32044
		35942	201804 retina 4.3-2	38964		91019		82068.7
		40421		40355		70262		37162.8
		44286		26608		68339		86104.5
		46547		33883		73343		83691.9
		38574		48275	201804 retina 4.5-2	82837		19962
		39034		29268		86584		37344
		35464		38189		68810		59692
	201804 retina 1.11-1	42404	201804 retina 6.6-1	45037		96031	201804 retina 1.10-1	42404
		37667		33674		80694		59610.2
		39814		36937	201804 retina 4.12-1	71670		82895.5
		37230		42982		61327		86316.5
		38212		42462		67676		97584.2
		39236		38298		64482		73305.7
		43867		45350		66541		71266.2
		39947		38886		54564		76607.1
	201804 retina 1.11-2	29225	201804 retina 6.6-2	43892		65899	201804 retina 1.10-2	29225
		33748		36854		90892		92881.3
		28094		43214		85080		76676.9
		35720		50041	201804 retina 4.12-2	50311		105771
		39948		43295		46931		85775.8
		31780		35228		66691		38676
		32049		44506		63448		56963
		46925		38007		57133		29089
	201804 retina 9.8-1	47758	201804 retina 3.1-1	43416		69684	201804 retina 1.12-1	47758
		34120		40194		50844		65629.5
		38714		47305	201804 retina 6.8-1	42647		72759.3
		44050		44310		66476		66694.3
		39497		42667		53906		70138.5
		30373		46589		53306		60951.1
		32185		46768		46205		72901.7
		28617		37785		53695		99618.6
		28281	201804 retina 3.1-2	46487		59751		141879
	201804 retina 9.8-2	43103		38680		41790	201804 retina 1.12-2	43103
		48238		47830	201804 retina 6.8-2	85645		44529.7
		49972		46838		76148		67943.6
		49934		42171		59267		64137.3
		35406		45899		54918		61022.3
		42618		48185		68904		73310.1
		40829		41823		61432		53640.4
		42486	201804 retina 3.6-1	41602		68902		41160
	201804 retina 5.1-1	37129		38042		77502	201804 retina 9.9-1	31860
		37907		49247				35730.9
		29071		33330				26383.1
		36785		47543				49992.5
		36006		42751				31595.2
		36057	201804 retina 3.6-2	36296				46420
		34294		35321				35331.7
	201804 retina 5.1-2	37026		34716			201804 retina 9.9-2	33405
		50539		36804				47897.1
		45989		33704				28185.2
		45066	201804 retina 7.2-1	44490				27557.8
		37389		42616				32322.9
		32544		43147				38013.9
		38054		33138				34525.9
		43978		42102				46829.4
	201804 retina 7.4-1	31860		52892
		34563		27704
		39242		43795
		40054	201804 retina 7.2-2	37833
		37883		40511
		38404		42967
		37780		55671
	201804 retina 7.4-2	33405		44525
		30933		38575
		35869		34022
		35045		44823
		33046
		28888
		27871
		46053
Figure 4F
			ESM-1 Red 555
	PKA WT /ATG5 WT/ CRE		PKA WT/ ATG5 ECKO/ CRE		dnPKAiEC/ATG5 WT/CRE		dnPKAiEC/ATG5ECKO/ CRE
	Retinas(n=10)	images(n=79)	Retinas(n=10)	images(n=75)	Retinas(n=7)	images(n=50)	Retinas(n=8)	images(n=68)
	201804 retina 4.6-1	413	201804 retina 4.3-1	1595	201804 retina 1.3-2	9351	201804 retina 4.9-1	7583
		720		1223		9798		8111
		1155		2385		9441		11426
		1169		3126		14407		9059
		774		1703		11313		6686
		560		978	201804 retina 4.5-1	18499		8737
		642		1248		11660		9372
		573		2967		11306		6756
	201804 retina 4.6-2	1028		684		6072		8856
		588	201804 retina 4.3-2	3761		22396	201804 retina 4.9-2	7535
		602		3187		11939		7046
		755		1708		10991		10381
		827		1173		11462		13918
		532		4462	201804 retina 4.5-2	26303		13931
		1616		4713		18832		10738
		1100		2591		5523		13419
	201804 retina 1.11-1	3276		1792		15509		11428
		1109	201804 retina 6.6-1	304		11588		5341
		1192		242	201804 retina 4.12-1	13311		8416
		341		763		7410	201804 retina 1.10-1	5701
		249		637		7262		8078
		1074		703		7348		8673
		900		335		9987		9903
		1446		508		11198		4674
	201804 retina 1.11-2	1082		1151		14368		6627
		675	201804 retina 6.6-2	565		19231		6337
		934		2188		18139	201804 retina 1.10-2	2844
		582		358	201804 retina 4.12-2	7861		3637
		1032		674		10083		6105
		1198		887		11588		8104
		349		1722		11391		5224
		2084		916		6837		2064
	201804 retina 9.8-1	287		948		14300		1215
		736	201804 retina 3.1-1	1963		11527		2053
		991		1525	201804 retina 6.8-1	9292	201804 retina 1.12-1	9516
		340		2326		13661		7190
		873		3052		14678		10059
		691		1438		15367		9791
		715		2261		15147		13935
		289		3210		11977		7568
		397		4249		12624		7873
	201804 retina 9.8-2	945	201804 retina 3.1-2	1565		8678		6339
		483		2858	201804 retina 6.8-2	18787		8147
		260		2057		17186		4340
		1203		2370		13364		8519
		1009		1469		11760	201804 retina 1.12-2	8512
		485		3170		12560		16140
		359		2587		14102		6241
		309		3141		13514		7216
	201804 retina 5.1-1	648	201804 retina 3.6-1	5786		16950		6384
		303		3305				12453
		453		1624				6594
		427		2035				6093
		274		2535			201804 retina 9.9-1	12772
		649		4238				12030
		238	201804 retina 3.6-2	1036				5786
	201804 retina 5.1-2	601		2578				9897
		473		3490				14182
		814		2791				10370
		693	201804 retina 7.2-1	1734				11560
		755		3474				14906
		663		4588			201804 retina 9.9-2	16930
		936		1498				8315
		809		2299				11665
	201804 retina 7.4-1	2067		2307				8644
		2368		2244				4392
		1248		5002				9240
		1938	201804 retina 7.2-2	2797				11690
		3876		937
		2424		1458
		1046		1604
	201804 retina 7.4-2	3041		4599
		1140		1870
		1174		1063
		2522		1365
		1717
		2027
		786
		2013
