# Supplementary material for: Endothelial PKA activity regulates angiogenesis by limiting autophagy through phosphorylation of ATG16L1
Source: eLife. 2019 Oct 3;8:e46380. doi: 10.7554/eLife.46380 (PMC6797479; doi:10.7554/eLife.46380)
Supplement: Figure 5—source data 1. [file elife-46380-fig5-data1.xlsx]

## Sheet: Figure 5B-5C
	series	ERG nuclear	ERG&Edu nuclear
wtPKA wtATG5
m8.2_b	4	78	22
	3	95	18
	2	84	22
	1	81	23
m8.4_b	4	60	6
	3	31	4
	2	49	7
	1	51	6
m9.1_a	4	40	3
	N 3 edu weak	71	0
	2	85	28
	1	103	26
m9.2_a	4	64	12
	3	86	13
	2	54	15
	1	66	7
m9.5_a	4	71	16
	3	77	26
	2	55	13
	1	66	8
m9.5_b	4	58	17
	3	48	8
	2	60	25
	1	63	21
m9.12_b	4	69	11
	3	98	39
	2	85	28
	1	86	16
dnPKAiEC wtATG5
m8.3_b	4	95	29
	3	109	26
	2	102	18
	1	95	19
m8.5_b	4	162	17
	3	104	25
	2	111	18
	1	99	12
m9.6_b	4	134	23
	3	169	21
	2	112	29
	1	203	38
m9.7_a	4	159	31
	3	93	23
	2	103	17
	1	151	24
m9.7_b	4	91	32
	3	124	35
	2	162	55
	1	149	64
m9.8_a	4	125	45
	3	193	49
	2	137	39
	1	133	20
m9.8_b	4	134	36
	3	185	63
	2	157	42
	1	197	77
m9.11_a	4	205	71
	3	151	79
	2	111	24
	1	112	42
m9.11_b	4	245	73
	3	157	69
	2	106	26
	1	196	43
wtPKA ATG5ECKO
mB2_b	4	85	25
	3	112	25
	2	88	10
	1	78	20
mB3_a	4	60	12
	3	47	18
	2	86	20
	1	98	16
mB3_b	4	75	19
	3	73	14
	2	93	31
	1	90	30
mD2_a	4	68	10
	3	42	9
	2	52	8
	1	69	22
mD5_b	4	66	21
	3	79	18
	2	55	14
	1	109	25
mD6_b	4	57	7
	3	68	20
	2	61	8
	1	92	11
dnPKAiEC ATG5ECKO
mB1_b	4	133	31
	3	97	34
	2	109	28
	1	151	33
mB4_a	4	137	34
	3	132	31
	2	153	34
	1	189	51
mB4_b	4	154	33
	3	155	26
	2	125	33
	1	148	27
mB5_a	4	82	23
	3	92	16
	2	128	21
	1	134	26
mB5_b --	-6	56	10
	5	65	14
	4	182	23
	2	88	25
mB6_a	6	102	40
	5	121	46
	4	57	13
	3	92	15
mB6_b	4	74	31
	3	103	41
	2	93	19
	1	139	41
mD3_a --	4	125	20
	3	96	17
	2	88	24
	1	112	5
mD3_b	4	73	21
	3	174	27
	2	142	45
	1	96	19

## Sheet: Figure 5D
	series	ERG nuclear	ERG&Edu nuclear	ERG&Edu/ERG
wtPKA wtATG5
m8.2_b	Total	338	85	0.251479
m8.4_b	Total	191	23	0.120419
m9.1_a	Total	299	57	0.190635
m9.2_a	Total	270	47	0.174074
m9.5_a	Total	269	63	0.234201
m9.5_b	Total	229	71	0.310044
m9.12_b	Total	338	94	0.278107
dnPKAiEC wtATG5
m8.3_b	Total	401	92	0.229426
m8.5_b	Total	476	72	0.151261
m9.6_b	Total	618	111	0.179612
m9.7_a	Total	506	95	0.187747
m9.7_b	Total	526	186	0.353612
m9.8_a	Total	588	153	0.260204
m9.8_b	Total	673	218	0.323923
m9.11_a	Total	579	216	0.373057
m9.11_b	Total	704	211	0.299716
wtPKA ATG5ECKO
mB2_b	Total	363	80	0.220386
mB3_a	Total	291	66	0.226804
mB3_b	Total	331	94	0.283988
mD2_a	Total	231	49	0.212121
mD5_b	Total	309	78	0.252427
mD6_b	Total	278	46	0.165468
dnPKAiEC ATG5ECKO
mB1_b	Total	490	126	0.257143
mB4_a	Total	611	150	0.245499
mB4_b	Total	582	119	0.204467
mB5_a	Total	436	86	0.197248
mB5_b --	Total	391	72	0.184143
mB6_a	Total	372	154	0.413978
mB6_b	Total	409	132	0.322738
mD3_a --	Total	421	66	0.15677
mD3_b	Total	485	112	0.230928

## Sheet: Figure 5F
Mouse	Retina	Total area (um2)	Total nuclei +	Nuclei + / area (um2)
2.6	a	644852	3	4.65223e-06	8.72379e-06	0.516914	wtPKA wtATG5
2.6	b	637714	2	3.1362e-06		0.348467
3.4	a	870392	3	3.44672e-06		0.382969
3.4	b	913780	10	1.09435e-05		1.21595
4.6	a	711265	8	1.12476e-05		1.24973
4.6	b	867527	1	1.1527e-06		0.128078
4.8	a	933029	20	2.14356e-05		2.38173
4.8	b	943684	13	1.37758e-05		1.53064
2.2	a	1.20913e+06	4	3.30817e-06		0.367574	dnPKAiEC wtATG5
2.2	b	1.20154e+06	7	5.82587e-06		0.647319
2.5	a	1.49334e+06	19	1.27231e-05		1.41368
2.5	b	1.57236e+06	24	1.52636e-05		1.69596
3.1	a	1.44559e+06	14	9.68464e-06		1.07607
3.1	b	1.53551e+06	22	1.43275e-05		1.59194
3.2	a	943021	12	1.27251e-05		1.4139
3.2	b	1.08199e+06	30	2.77267e-05		3.08074
A1	a	843855	2	2.37008e-06		0.263342	wtPKA ATG5ECKO
A1	b	776894	0	0		0
A2	a	232279	0	0		0
A2	b	846497	9	1.06321e-05		1.18134
A3	a	1.06435e+06	10	9.39542e-06		1.04394
A3	b	922898	10	1.08354e-05		1.20394
A4	a	1.53299e+06	4	2.60927e-06		0.289919	dnPKAiEC ATG5ECKO
A4	b	1.65967e+06	12	7.23037e-06		0.803375
A5	a	1.33904e+06	23	1.71765e-05		1.9085
A5	b	1.48517e+06	29	1.95264e-05		2.1696
A6	a	1.5033e+06	40	2.66081e-05		2.95646
A6	b	1.36241e+06	26	1.90838e-05		2.12043
A7	a	1.61582e+06	25	1.5472e-05		1.71911
A7	b	1.69547e+06	30	1.76942e-05		1.96602

## Sheet: raw 5B-5D
	series	ERG nuclear	ERG&Edu nuclear
mB6_a	6	102	40
	5	121	46
	4	57	13
	3	92	15
	Total	372	154
mB6_b	4	74	31
	3	103	41
	2	93	19
	1	139	41
	Total	409	132
mD2_a	4	68	10
	3	42	9
	2	52	8
	1	69	22
	Total	231	49
m8.2_b	4	78	22
	3	95	18
	2	84	22
	1	81	23
	Total	338	85
m8.3_b	4	95	29
	3	109	26
	2	102	18
	1	95	19
	Total	401	92
mB1_b	4	133	31
	3	97	34
	2	109	28
	1	151	33
	Total	490	126
mB2_b	4	85	25
	3	112	25
	2	88	10
	1	78	20
	Total	363	80
mB3_a	4	60	12
	3	47	18
	2	86	20
	1	98	16
	Total	291	66
mB3_b	4	75	19
	3	73	14
	2	93	31
	1	90	30
	Total	331	94
mB4_a	4	137	34
	3	132	31
	2	153	34
	1	189	51
	Total	611	150
mB4_b	4	154	33
	3	155	26
	2	125	33
	1	148	27
	Total	582	119
mB5_a	4	82	23
	3	92	16
	2	128	21
	1	134	26
	Total	436	86
mB5_b --	-6	56	10
	5	65	14
	4	182	23
	2	88	25
	Total	391	72
mD3_a --	4	125	20
	3	96	17
	2	88	24
	1	112	5
	Total	421	66
mD3_b	4	73	21
	3	174	27
	2	142	45
	1	96	19
	Total	485	112
mD5_b	4	66	21
	3	79	18
	2	55	14
	1	109	25
	Total	309	78
mD6_b	4	57	7
	3	68	20
	2	61	8
	1	92	11
	Total	278	46
m8.4_b	4	60	6
	3	31	4
	2	49	7
	1	51	6
	Total	191	23
m8.5_b	4	162	17
	3	104	25
	2	111	18
	1	99	12
	Total	476	72
m9.1_a	4	40	3
	N 3 edu weak	71	0
	2	85	28
	1	103	26
	Total	299	57
m9.2_a	4	64	12
	3	86	13
	2	54	15
	1	66	7
	Total	270	47
m9.5_a	4	71	16
	3	77	26
	2	55	13
	1	66	8
	Total	269	63
m9.5_b	4	58	17
	3	48	8
	2	60	25
	1	63	21
	Total	229	71
m9.6_b	4	134	23
	3	169	21
	2	112	29
	1	203	38
	Total	618	111
m9.7_a	4	159	31
	3	93	23
	2	103	17
	1	151	24
	Total	506	95
m9.7_b	4	91	32
	3	124	35
	2	162	55
	1	149	64
	Total	526	186
m9.8_a	4	125	45
	3	193	49
	2	137	39
	1	133	20
	Total	588	153
m9.8_b	4	134	36
	3	185	63
	2	157	42
	1	197	77
	Total	673	218
m9.11_a	4	205	71
	3	151	79
	2	111	24
	1	112	42
	Total	579	216
m9.11_b	4	245	73
	3	157	69
	2	106	26
	1	196	43
	Total	704	211
m9.12_b	4	69	11
	3	98	39
	2	85	28
	1	86	16
	Total	338	94
