# Supplementary material for: Endothelial PKA activity regulates angiogenesis by limiting autophagy through phosphorylation of ATG16L1
Source: eLife journal article supplement (doi:10.7554/elife.46380), 2019-10-03
Supplement: supp [file elife_poa_e46380_Transparent_Reporting_File.docx]

***eLife’s* transparent reporting form**

We encourage authors to provide detailed information *within their submission* to facilitate the interpretation and replication of experiments. Authors can upload supporting documentation to indicate the use of appropriate reporting guidelines for health-related research (see [EQUATOR Network](http://www.equator-network.org/%20)), life science research (see the [BioSharing Information Resource](https://biosharing.org/" \t "_blank)), or the [ARRIVE guidelines](http://www.plosbiology.org/article/info:doi/10.1371/journal.pbio.1000412) for reporting work involving animal research. Where applicable, authors should refer to any relevant reporting standards documents in this form.

If you have any questions, please consult our Journal Policies and/or contact us: [editorial@elifesciences.org](mailto:editorial@elifesciences.org).

**Sample-size estimation**

- You should state whether an appropriate sample size was computed when the study was being designed
- You should state the statistical method of sample size computation and any required assumptions
- If no explicit power analysis was used, you should describe how you decided what sample (replicate) size (number) to use

Please outline where this information can be found within the submission (e.g., sections or figure legends), or explain why this information doesn’t apply to your submission:

The Western Blot protein samples were measured by BCA kit and applied the same amount of protein for the experiments. The retinas were all collected at P6 and compared within the same litter. The information of sample size and statistical method can be found in the figure legends, figure supplements and Materials and methods section.

All animal husbandry and experimental procedures were approved by the animal ethics committee of KU Leuven.

**Replicates**

- You should report how often each experiment was performed
- You should include a definition of biological versus technical replication
- The data obtained should be provided and sufficient information should be provided to indicate the number of independent biological and/or technical replicates
- If you encountered any outliers, you should describe how these were handled
- Criteria for exclusion/inclusion of data should be clearly stated
- High-throughput sequence data should be uploaded before submission, with a private link for reviewers provided (these are available from both GEO and ArrayExpress)

Please outline where this information can be found within the submission (e.g., sections or figure legends), or explain why this information doesn’t apply to your submission:

All information on replicates for the Western blot and mouse retina experiments can be found in the figure legends or source data files.

**Statistical reporting**

- Statistical analysis methods should be described and justified
- Raw data should be presented in figures whenever informative to do so (typically when N per group is less than 10)
- For each experiment, you should identify the statistical tests used, exact values of N, definitions of center, methods of multiple test correction, and dispersion and precision measures (e.g., mean, median, SD, SEM, confidence intervals; and, for the major substantive results, a measure of effect size (e.g., Pearson's r, Cohen's d)
- Report exact p-values wherever possible alongside the summary statistics and 95% confidence intervals. These should be reported for all key questions and not only when the p-value is less than 0.05.

Please outline where this information can be found within the submission (e.g., sections or figure legends), or explain why this information doesn’t apply to your submission:

Statistical analysis is described in the subparagraph of the Materials and Methods section. One-way ANOVA test was used for statistical analysis of the protein degradation in figure 3 (A,B,C,D,E,F,G), the radial expansion, sprouts/100μm, vascular area and tip cell area in figure 4 (B,C,E,F), total number of endothelial cells and proliferating endothelial cells, the ratio of proliferating endothelial cells and apoptosis of endothelial cells in figure 5 (B,C,D,F). Raw source data are uploaded as Excel files.

(For large datasets, or papers with a very large number of statistical tests, you may upload a single table file with tests, Ns, etc., with reference to sections in the manuscript.)

**Group allocation**

- Indicate how samples were allocated into experimental groups (in the case of clinical studies, please specify allocation to treatment method); if randomization was used, please also state if restricted randomization was applied
- Indicate if masking was used during group allocation, data collection and/or data analysis

Please outline where this information can be found within the submission (e.g., sections or figure legends), or explain why this information doesn’t apply to your submission:

For retina ATG5 deletion in endothelial cells rescue experiment displayed in figure 4 and figure 5, mice of the same genotype as one group, which is indicated in the figures and figure legends.

For the CQ retina treatment experiments displayed in figure 4-supplement1, the pups were genotyped at the P1. Within each litter, mice of the same genotype were divided into control and QC treatment groups for injections from P1 to P3.

**Additional data files (“source data”)**

- We encourage you to upload relevant additional data files, such as numerical data that are represented as a graph in a figure, or as a summary table
- Where provided, these should be in the most useful format, and they can be uploaded as “Source data” files linked to a main figure or table
- Include model definition files including the full list of parameters used
- Include code used for data analysis (e.g., R, MatLab)
- Avoid stating that data files are “available upon request”

Please indicate the figures or tables for which source data files have been provided:

Raw resource data of figure 3, figure 4 figure 5 and figure 4-supplement 1 are uploaded as Excel files.
